# Supplementary material for: SLCO5A1 and synaptic assembly genes contribute to impulsivity in juvenile myoclonic epilepsy
Source: bioRxiv or medRxiv preprint supplement (doi:10.1101/2022.04.19.22273994), 2022-04-22
Supplement: Supplementary file [file media-1.pdf]

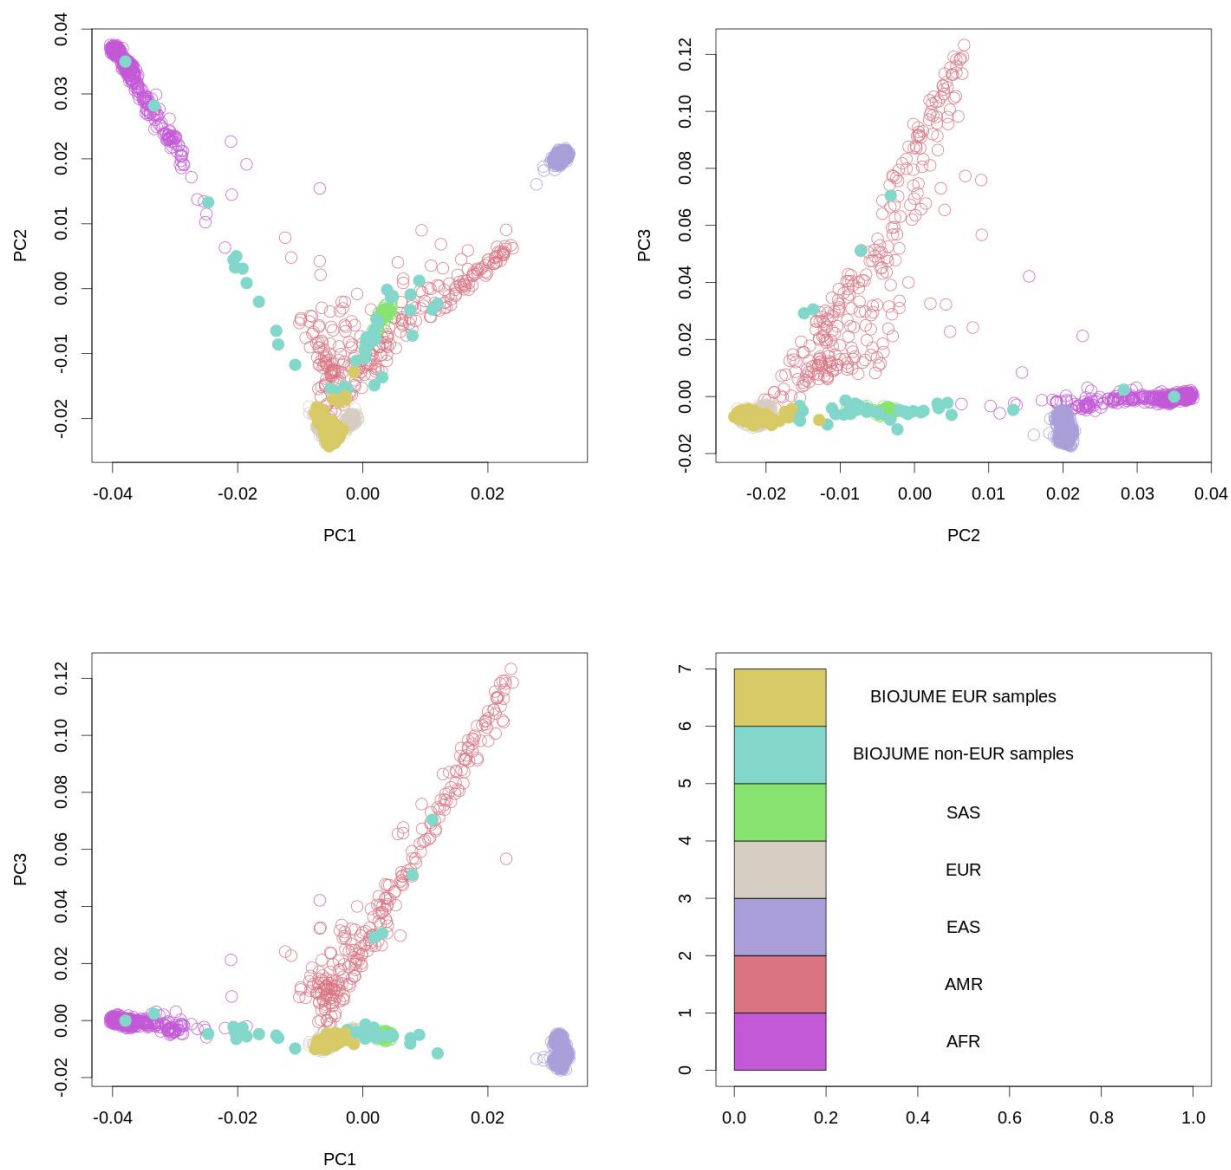

**Supplementary Fig. 1. Principal component analysis (PCA) of all study samples with the 1000 Genomes (phase 3).** BIOJUME samples who were admixed or AMR were kept if they were within 6 standard deviations from the European cluster. SAS, South Asian; EUR, European; EAS, East Asian; AFR, African; AMR, Ad Mixed American.
