# Supplementary material for: SLCO5A1 and synaptic assembly genes contribute to impulsivity in juvenile myoclonic epilepsy
Source: bioRxiv or medRxiv preprint supplement (doi:10.1101/2022.04.19.22273994), 2022-04-22
Supplement: Supplementary file [file media-2.pdf]

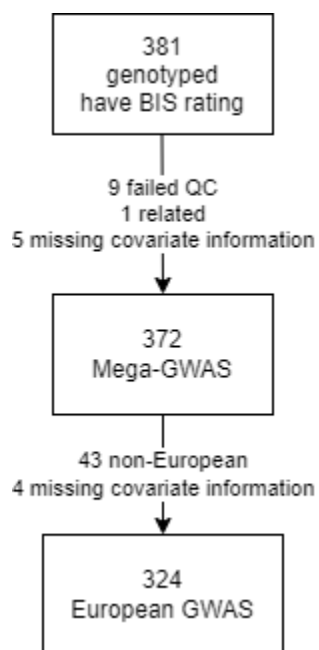

**Supplementary Fig. 2. Flowchart of inclusion for the mega-GWAS and the European GWAS.** The mega-GWAS includes individuals of all ethnic backgrounds, while the main European GWAS includes those individuals within six standard deviations from the 1000 Genomes-defined European cluster.
